# Supplementary material
Source: PubMed Central journal article supplement (PMC9343004)
Supplement: kiac161_supplementary_data.pdf [file kiac161_supplementary_data.pdf]

## **NADP<sup>+</sup> Supply Adjusts the Synthesis of Photosystem I in Arabidopsis Chloroplasts**

**Daili Ji<sup>1,\*</sup>, Qiuxin Li<sup>1,2</sup>, Yinjie Guo<sup>1,2</sup>, Wenjing An<sup>1,2</sup>, Nikolay Manavski<sup>3</sup>, Jörg Meurer<sup>3</sup> and Wei Chi<sup>1,2,4,\*</sup> †**

**Supplemental Figure S1:** Analysis of the transient increase in chlorophyll fluorescence after termination of AL illumination.

**Supplemental Figure S2:** P700 signals normalized to chlorophyll contents in WT and *nadk2-2* plants.

**Supplemental Figure S3:** CET rate in WT and *nadk2-2* plants.

**Supplemental Figure S4:** 2D BN/SDS-PAGE analysis of thylakoid proteins.

**Supplemental Figure S5:** Effect of the *NADK2* mutation on HCF145 activity and accumulation.

**Supplemental Table S1:** Photosynthetic parameters of WT and *nadk2-2*.

**Supplemental Table S2:** PCR primers used in this study.

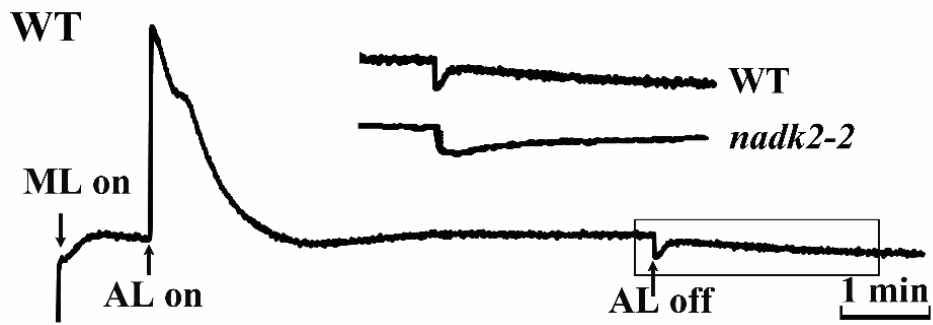

**Supplemental Figure S1. Analysis of the transient increase in chlorophyll fluorescence after termination of AL illumination.**

Chlorophyll fluorescence of Arabidopsis leaves was monitored using a pulse-amplitude-modulation chlorophyll fluorometer as described (Shikanai et al. 1998). For WT and *nadk2-2* a bordered area is enlarged.

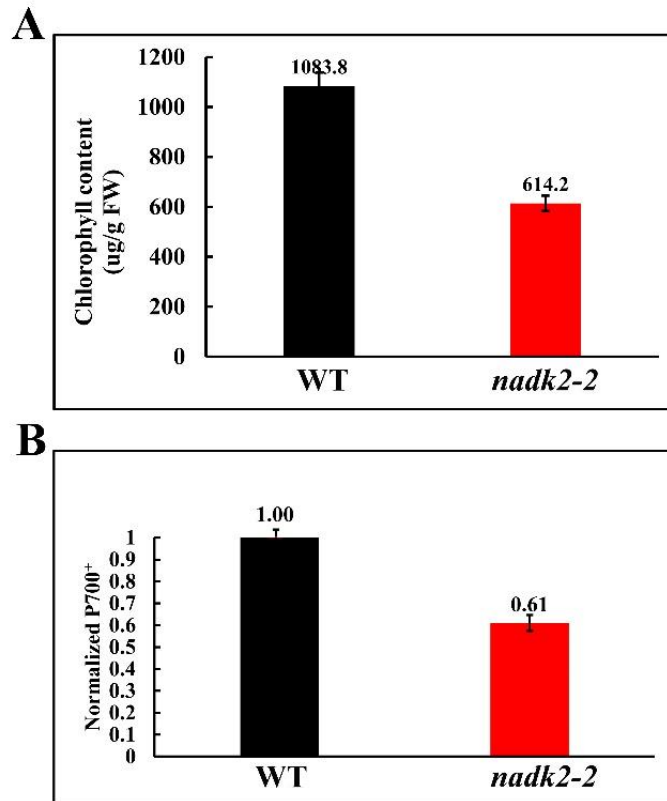

**Supplemental Figure S2: P700 signals normalized to chlorophyll contents in WT and *nadk2-2* plants.**

(A) Chlorophyll contents of three-week-old WT and *nadk2-2* plants. Values shown are means  $\pm$  SD of six replicate experiments.

(B) Relative P700 signals normalized to chlorophyll contents in WT and *nadk2-2* plants. The P700 signal of WT was set to 1. Values shown are means  $\pm$  SD of six replicate experiments.

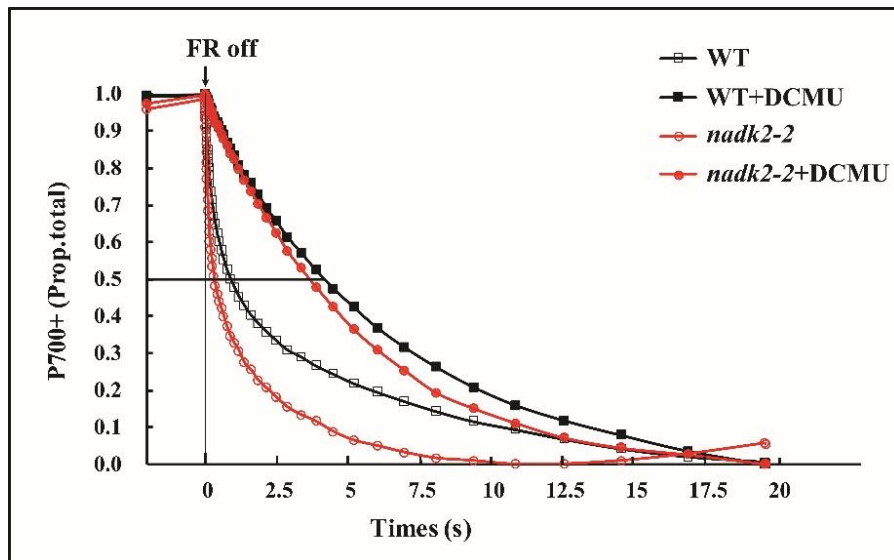

**Supplemental Figure S3: CET rate in WT and *nadk2-2* plants.**

The reduction of P700<sup>+</sup> following a 20 s flash of saturating far red (FR) light ( $\sim 8,000 \mu\text{mol m}^{-2} \text{s}^{-1}$ ) in leaves of WT and *nadk2-2* infiltrated with 20  $\mu\text{M}$  DCMU was measured. To avoid osmotic effects, leaves were infiltrated in the presence of 300 mM sorbitol. The mean value of the half-time of P700 re-reduction ( $t_{1/2}$  P700 red) with or without DCMU treatment in WT and mutant plants were shown in Supplemental Table1.

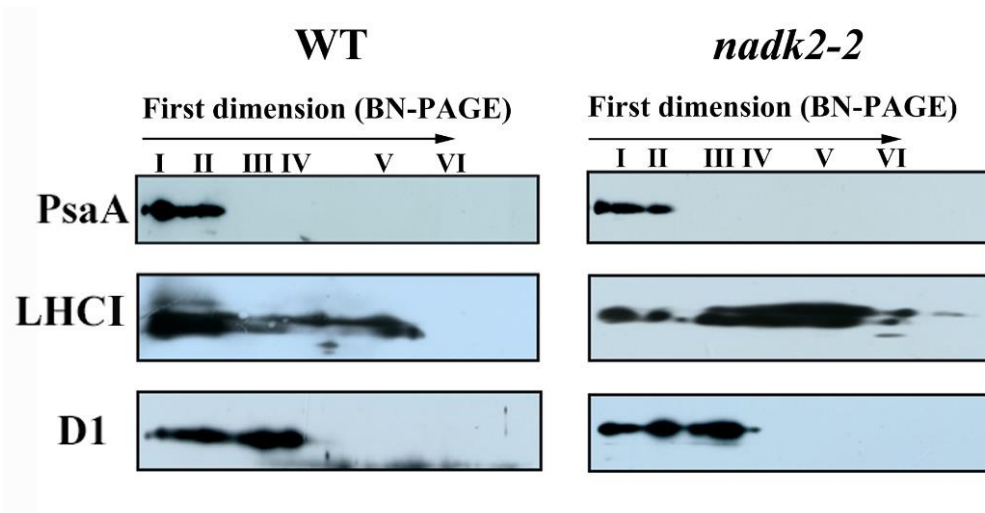

**Supplemental Figure S4: 2D BN/SDS-PAGE analysis of thylakoid proteins.**

Thylakoid complexes were separated by BN-PAGE as shown in **Figure 4** and further subjected to SDS-PAGE. Gels were probed with antibodies against PsaA, LHCI, and D1.

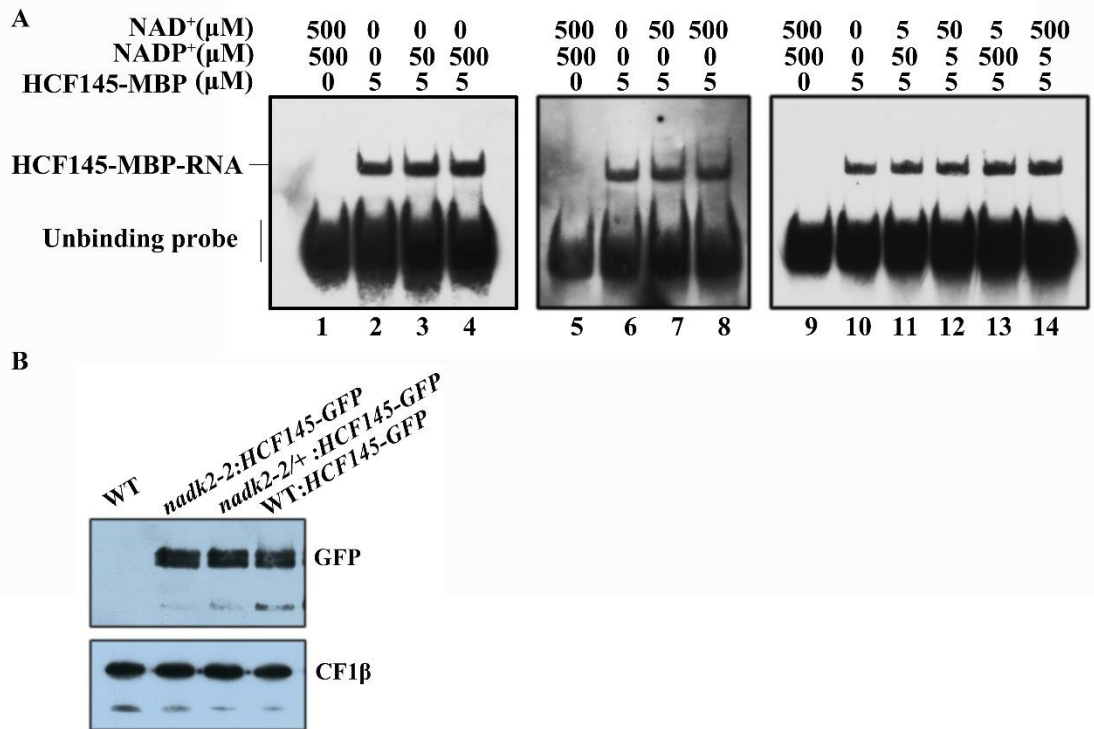

**Supplemental Figure S5: Effect of the *NADK2* mutation on HCF145 activity and accumulation.**

**(A)** EMSA assay of RNA-binding of HCF145 in the presence of NAD<sup>+</sup> and NADP<sup>+</sup>. The *psaA* 5' UTR probe used was described previously (Manavski et al., 2015). The binding reaction contained the indicated concentrations of recombinant HCF145-MBP, NAD<sup>+</sup>, and NADP<sup>+</sup>.

**(B)** Accumulation of HCF145 proteins in homozygous *nadk2-2*, heterozygous *nadk2-2*, and WT plants. The full-length HCF145 protein C-terminally fused to GFP was introduced into a heterozygous *nadk2-2* line by the floral dip method. Homozygous and heterozygous *nadk2-2* lines and WT plants were selected by genotyping the resulting T2 population of the same T1 plant and the abundance of the HCF145-GFP protein was assayed via immunoblotting with the GFP antibody. WT plants were used as a negative control. A replicate gel probed with CF1β is shown below as loading control.

**Supplemental Table S1. Photosynthetic parameters of WT and *nadk2-2*.**

| <b>Parameter</b>                                     | <b>Wild Type (n≥5<sup>a</sup>)</b> | <b><i>nadk2-2</i> (n≥5)</b> |
|------------------------------------------------------|------------------------------------|-----------------------------|
| <b>t<sub>1/2</sub> P700 red (ms)<sup>b</sup></b>     | 882 ± 42                           | 307 ± 29                    |
| <b>t<sub>1/2</sub> P700 red+DCMU(ms)<sup>c</sup></b> | 4186 ±147                          | 3612 ±118                   |
| <b>NPQ</b>                                           | 1.86± 0.04                         | 3.24± 0.07                  |
| <b>qE</b>                                            | 1.54± 0.04                         | 2.85± 0.07                  |
| <b>qI</b>                                            | 0.32± 0.04                         | 0.39± 0.07                  |

<sup>a</sup>Number of replicates

<sup>b</sup>Half-time of nonphotochemical P700 re-reduction in the dark (s) without DCMU treatment

<sup>c</sup>Half-time of nonphotochemical P700 re-reduction in the dark (s) with DCMU treatment

**Supplemental Table S2. PCR primers used in this study.**

| Names                                                                                    | Primer sequence 5'→3'                                                                                                         | Experiment                  |
|------------------------------------------------------------------------------------------|-------------------------------------------------------------------------------------------------------------------------------|-----------------------------|
| nadk2-1-LP                                                                               | TATTGGGAACAGTGCCAACTC                                                                                                         | T-DNA insertion             |
| nadk2-1-RP                                                                               | GAGAAATCCAAGAGACCCAG                                                                                                          |                             |
| SALKLBb1.3                                                                               | ATTTTGCCGATTTTCGGAAC                                                                                                          |                             |
| S1                                                                                       | CGCCGGATGATGAGAGAAGT                                                                                                          | Sequencing and RT-PCR       |
| S2                                                                                       | TCTTTCGTGATCGGTCGTGT                                                                                                          |                             |
| nadk coms                                                                                | GCGCGGTACCATGTTCTATGCTTTTGCCCTTGCC'                                                                                           | Complementation             |
| nadk coma                                                                                | GCGCGAGCTCTCATTGTGCATCGTCATCCTTGTAGTCTTTGTGCATCGTC<br>ATCCTTGTAGTCTTTGTGCATCGTCATCCTTGTAGTCTCAGAGAGCCTTTT<br>GATCAAGACGCTCG3' |                             |
| Fw-BamHI-HCF145                                                                          | GCGATATCGTCGACGGATCCAGCGGCGCCGGTGGTA                                                                                          | Recombinant HCF145-MBP      |
| Rev-BamHI-HCF145                                                                         | CCTGCAGGGAATTCGGATCCATATTGAACCCAATTG                                                                                          |                             |
| HCF145-1301-F :                                                                          | acgggggactctagaATGTCAGTGAGCAAGTTTCCAC                                                                                         | Complementation HCF145-FLAG |
| HCF145-1301-R :                                                                          | gtcatccttgtaatcATATTGAACCCAATTGATATCAAG                                                                                       |                             |
| <b>Primers used to probe for northern blot and polysome analysis (forward / reverse)</b> |                                                                                                                               |                             |
| <i>psbA</i>                                                                              | ACAACATTGTAGCTGCTCAC / CTAACACTAACGAATTATCC                                                                                   |                             |
| <i>psbD</i>                                                                              | ATGACTATAGCCCTTGGTAA / AGAGCGTTTCCACGTGGTAG                                                                                   |                             |
| <i>rps14</i>                                                                             | ATGGCAAAGAAAAGTTTGAT / TTACCAGCTTGATCTTGTTG                                                                                   |                             |
| <i>psaA</i>                                                                              | CAATTGGCGCATTGGTCTTCGCAG/<br>GTGCTCGCTGTTTCACCAGGGGCTG                                                                        | /                           |
| <i>ycf3</i>                                                                              | CGTGGAGAACAGGCCATTCA / TTATTCTGAAGCGCCTCGTGA                                                                                  |                             |
| <i>psaC</i>                                                                              | CGATCCTATGTCACATTAG / TCAATAAGCTAGACCCATAC                                                                                    |                             |
| <i>23S rRNA</i>                                                                          | TTCAAACGAGGAAAGGCTTA / AGGAGAGCACTCATCTTGGG                                                                                   |                             |
| <i>psaA</i>                                                                              | CAUAAUUGCUCUAGUGAAUAACUAAAGAAAAUAGAUGA/<br>AUAGAUGGAAGAUAGAAGAGA                                                              |                             |
